# Supplementary material
Source: PubMed Central journal article supplement (PMC5487281)
Supplement: NIHMS868659-supplement-Supplementary_Data.pdf [file NIHMS868659-supplement-Supplementary_Data.pdf]

**SUPPLEMENTAL MATERIAL**

**Supplemental Table I: Baseline characteristics of participants (N=222)**

|                                             | <b>No PLME<br/>(n = 149)</b> | <b>PLME<br/>(n = 73)</b> | <b>Total<br/>(n = 222)</b> | <b>p-value</b> |
|---------------------------------------------|------------------------------|--------------------------|----------------------------|----------------|
| <b>Demographics</b>                         |                              |                          |                            |                |
| Male gender, n                              | 55 (37)                      | 33 (45)                  | 88 (40)                    | 0.2607         |
| Age, y                                      | 71 [56-82]                   | 63 [54, 74]              | 68 [56, 81]                | 0.0494         |
| Race, n                                     |                              |                          |                            | 0.0234*        |
| White                                       | 94 (63)                      | 34 (47)                  | 128 (58)                   |                |
| Black                                       | 50 (34)                      | 37 (51)                  | 87 (39)                    |                |
| Asian                                       | 1 (1)                        | 0                        | 1 (<1)                     |                |
| Unknown                                     | 4 (3)                        | 2 (3)                    | 6 (3)                      |                |
| <b>Past Medical History and Medications</b> |                              |                          |                            |                |
| Hypertension, n                             | 116 (78)                     | 49 (67)                  | 165 (74)                   | 0.0823         |
| Past stroke, n                              | 56 (38)                      | 19 (26)                  | 75 (34)                    | 0.0785         |
| AFIB, n                                     | 55 (37)                      | 26 (36)                  | 81 (37)                    | 0.803          |
| DM, n                                       | 46 (31)                      | 30 (41)                  | 76 (34)                    | 0.1243         |
| CHF, n                                      | 36 (2416)                    | 20 (27)                  | 56 (26)                    | 0.661          |
| CKD, n                                      | 17 (11)                      | 6 (8)                    | 23 (10)                    | 0.475          |
| Antiplatelets, n                            | 64 (43)                      | 26 (36)                  | 90 (41)                    | 0.3146         |
| Anticoagulants, n                           | 22 (15)                      | 10 (14)                  | 32 (14)                    | 0.7471         |
| <b>Presentation characteristics</b>         |                              |                          |                            |                |
| Time to presentation, h                     | 3.88 [1.5, 10.1]             | 4.32 [1.4, 8.3]          | 4 [1.42, 9.13]             | 0.4964         |
| SBP, mm Hg                                  | 150 [136, 169]               | 160 [13.8, 180.5]        | 153 [136, 174]             | 0.6786         |
| DBP, mm Hg                                  | 80 [71, 101.8]               | 89 [74, 102.3]           | 83. [72, 102]              | 0.5649         |
| Temperature, °C                             | 36.7 [36.5, 36.9]            | 36.6 [36.3, 36.8]        | 36.7 [36.4,                | 0.2791         |

|                                             |                   |                  |                 |        |
|---------------------------------------------|-------------------|------------------|-----------------|--------|
|                                             |                   |                  | 36.9]           |        |
| Creatinine, mg/dL                           | 1.02 [0.84, 1.25] | 1.04 [0.81,1.26] | 1.03 [0.8-1.3]  | 0.963  |
| Glucose, mg/dL                              | 130 [110, 160]    | 143 [117, 185]   | 134 [111, 173]  | 0.008  |
| WBC, cells/mcL                              | 9.2 [7.4, 11.4]   | 10.2 [8, 13.1]   | 9.5 [7.6, 12.2] | 0.0079 |
| INR                                         | 1.07 [1, 1.2]     | 1.1 [1.0, 1.2]   | 1.1 [1, 1.2]    | 0.7829 |
| <b>Stroke Characteristics and Therapies</b> |                   |                  |                 |        |
| NIHSS on arrival                            | 17 [13, 22]       | 18 [16, 23]      | 18 [14, 22]     | 0.321  |
| Max NIHSS within 24 hours                   | 21 [17, 26]       | 23 [18, 28]      | 22 [18, 26]     | 0.0371 |
| No acute intervention, n                    | 74 (50)           | 43 (59)          | 117 (52)        | 0.1802 |
| tPA , n                                     | 64 (43)           | 26 (36)          | 90 (41)         | 0.3146 |
| Thrombectomy, n                             | 24 (16)           | 8 (11)           | 32 (14)         | 0.3166 |
| DNR within 24 hours, n                      | 12 (8)            | 6 (8)            | 18 (8)          | 0.9548 |
| <b>Imaging Characteristics</b>              |                   |                  |                 |        |
| ASPECTS                                     | 8 [6, 9]          | 7 [4, 9]         | 8 [5, 9]        | 0.0548 |
| Left Hemispheric Stroke, n                  | 76 (51)           | 31 (42)          | 107 (48)        | 0.2146 |
| MLS (mean)                                  | 0.5 (0.23)        | 2.88 (4.05)      | 1.29 (2.86)     | <0.001 |
| ACA involvement, n                          | 8 (5)             | 16 (22)          | 24 (11)         | 0.0005 |
| PCA involvement, n                          | 3 (2)             | 7 (10)           | 10 (5)          | 0.0195 |
| Hyperdense MCA, n                           | 72 (48)           | 41 (56)          | 113 (51)        | 0.2939 |
| Basal cistern effacement, n                 | 2 (1)             | 14 (19)          | 16 (7)          | 0.0002 |
| Hemorrhage, n                               | 6 (4)             | 12 (16)          | 18 (8)          | 0.003  |
| <b>Outcomes</b>                             |                   |                  |                 |        |
| PLME, n                                     | NA                | 73 (100)         | 73 (33)         | NA     |

|                                |         |                      |                      |         |
|--------------------------------|---------|----------------------|----------------------|---------|
| Death, n                       | 28 (19) | 50 (68)              | 78 (35)              | NA      |
| Death due to cerebral edema, n | 0 (0)   | 46 (63)              | 46 (21)              | NA      |
| Osmotics within 24 hours, n    | 9 (6)   | 27 (37)              | 36 (16)              | <0.0001 |
| Osmotics in hospitalization, n | 32 (21) | 62 (85)              | 94 (42)              | <0.0001 |
| DHC, n                         | 0 (0)   | 27 (37)              | 27 (12)              | NA      |
| Time to DHC (hrs)              | NA      | 48.23 [28.67, 65.51] | 48.23 [28.67, 65.51] | NA      |

Data presented as number (%) or median [IQR] unless indicated otherwise. AFIB= previous or admission diagnosis of atrial fibrillation; DM= Diabetes Mellitus; CHF= Congestive Heart Failure; CKD= Chronic Kidney Disease; SBP= Systolic Blood Pressure; DBP= Diastolic Blood Pressure; INR= International Normalized Ratio; DNR= Do Not Resuscitate; ASPECTS= Alberta Stroke Program Early CT Score. ACA involvement= Anterior Cerebral Artery; PCA involvement= Posterior Cerebral Artery; MCA= Middle Cerebral Artery. \*P-value was calculated for Black race versus other races. Osmotics within 24 hours indicates that mannitol or hypertonic saline were administered within 24 hours of last known normal.

### Supplemental Table II: Multivariate Model for Potentially Lethal Malignant Edema

| Variable                   | Beta    | Standard Error | Odds Ratio Estimates | 95% Wald Confidence Limits |        | p value |
|----------------------------|---------|----------------|----------------------|----------------------------|--------|---------|
| Intercept                  | -2.1679 | 0.4547         | NA                   | NA                         | NA     | NA      |
| Glucose (10 mg/dL)         | 0.0545  | 0.0227         | 1.056                | 1.104                      | 1.010  | 0.0161  |
| Midline shift (mm)         | 0.2614  | 0.0744         | 1.299                | 1.112                      | 1.503  | 0.0004  |
| Basilar Cistern Effacement | 1.6626  | 0.8792         | 5.273                | 0.941                      | 29.542 | 0.0586  |
| Previous stroke            | -0.7034 | 0.3649         | 0.495                | 0.242                      | 1.012  | 0.0539  |
| No acute intervention      | 0.6626  | 0.3342         | 1.940                | 1.007                      | 3.735  | 0.0475  |

Glucose is reported by increments of 10 units. Previous stroke is identified by history. No acute intervention indicates the absence of tissue-Plasminogen Activator or thrombectomy.

**Supplemental Table III: EDEMA Score Performance Measures**

| <b>EDEMA Score</b> | <b>Case Frequency</b> | <b>Probability of PLME</b> | <b>Sensitivity</b> | <b>Specificity</b> | <b>PPV</b> |
|--------------------|-----------------------|----------------------------|--------------------|--------------------|------------|
| 0                  | 11                    | 16.48%                     | 1.000              | 0.000              | 33%        |
| 1                  | 71                    | 24.97%                     | 0.986              | 0.067              | 34%        |
| 2                  | 42                    | 35.96%                     | 0.849              | 0.477              | 44%        |
| 3                  | 42                    | 48.64%                     | 0.726              | 0.698              | 54%        |
| 4                  | 25                    | 61.50%                     | 0.452              | 0.846              | 59%        |
| 5                  | 10                    | 72.93%                     | 0.342              | 0.960              | 81%        |
| 6                  | 5                     | 81.96%                     | 0.247              | 0.980              | 86%        |
| 7                  | 3                     | 88.46%                     | 0.205              | 0.993              | 93%        |
| 8                  | 2                     | 92.82%                     | 0.164              | 0.993              | 92%        |
| 9                  | 2                     | 95.62%                     | 0.137              | 0.993              | 91%        |
| 10                 | 2                     | 97.35%                     | 0.110              | 0.993              | 89%        |
| 11                 | 4                     | 98.41%                     | 0.082              | 0.993              | 85%        |
| 12                 | 3                     | 99.05%                     | 0.027              | 0.993              | 65%        |

Performance measurements include sensitivity, specificity and positive predictive value (PPV).

**Supplemental Table IV: Radiographic Markers**

| <b>Radiographic Marker</b> | <b>Mean Time (hrs)</b> |
|----------------------------|------------------------|
| Midline Shift              |                        |
| >0-3mm                     | 17                     |
| >3-6mm                     | 15.7                   |
| >6-9mm                     | 15.5                   |
| Basilar Cistern Effacement | 14.6                   |
